# Supplementary material
Source: PubMed Central journal article supplement (PMC6644893)
Supplement: ao8b00832_si_001.pdf [file ao8b00832_si_001.pdf]

# Supporting Information

## $\alpha,\epsilon$ -Hybrid Peptide Foldamers: Self-assembly of Peptide with *trans* Carbon-Carbon Double Bonds in the Backbone and its Saturated Analogue

Mintu Debnath, Tanmay Das, Debasish Podder and Debasish Halder\*

Department of Chemical Sciences, Indian Institute of Science Education and Research Kolkata,

Mohanpur, West Bengal 741246, India,

Fax: +913325873020; Tel: +913325873119;

E-mail: [deba\\_h76@yahoo.com](mailto:deba_h76@yahoo.com); [deba\\_h76@iiserkol.ac.in](mailto:deba_h76@iiserkol.ac.in)

### Table of content

| <b>Contents.</b> | <b>Page No.</b> | <b>Contents.</b> | <b>Page No.</b> |
|------------------|-----------------|------------------|-----------------|
| Figure S1        | 2               | Figure S15       | 9               |
| Figure S2        | 2               | Figure S16       | 10              |
| Figure S3        | 3               | Figure S17       | 10              |
| Table S1         | 3               | Figure S18       | 11              |
| Figure S4        | 3               | Figure S19       | 11              |
| Table S2         | 4               | Figure S20       | 12              |
| Figure S5        | 4               | Figure S21       | 12              |
| Figure S6        | 5               | Figure S22       | 13              |
| Figure S7        | 5               | Figure S23       | 13              |
| Figure S8        | 6               | Figure S24       | 14              |
| Figure S9        | 6               | Figure S25       | 14              |
| Figure S10       | 7               | Figure S26       | 15              |
| Figure S11       | 7               | Figure S27       | 15              |
| Figure S12       | 8               |                  |                 |
| Figure S13       | 8               |                  |                 |
| Figure S14       | 9               |                  |                 |

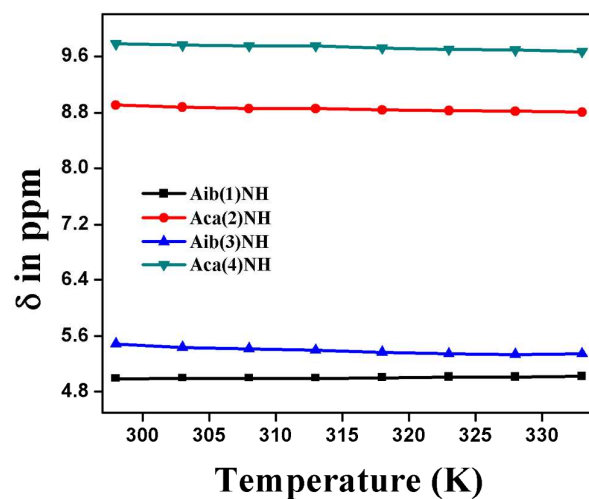

**Figure S1:** Plot of temperature dependence of NHs chemical shifts of Peptide 1 in  $\text{CDCl}_3$  solution.

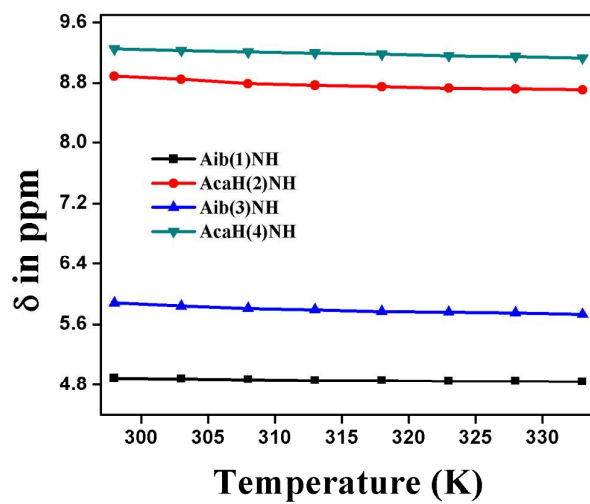

**Figure S2:** Plot of temperature dependence of NHs chemical shifts of Peptide 2 in  $\text{CDCl}_3$  solution.

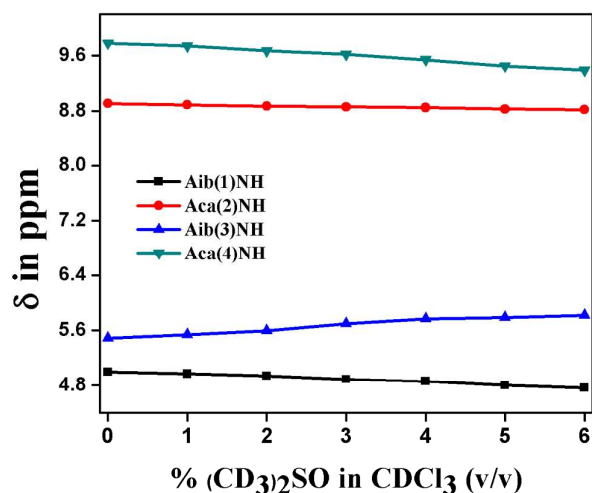

**Figure S3:** Plot of solvent dependence of NHs chemical shifts of peptide **1** at varying concentrations of (CD<sub>3</sub>)<sub>2</sub>SO in CDCl<sub>3</sub> solution.

**Table S1:** Characteristic <sup>1</sup>H NMR parameters for peptide **1** (chemical shifts  $\delta$ )<sup>a</sup>

| Residue  | $\delta$ (NH) | $\Delta\delta^b$ | $\Delta\delta^c$ |
|----------|---------------|------------------|------------------|
| Aib(1)NH | 4.99          | -0.23            | 0.04             |
| Aca(2)NH | 8.91          | -0.09            | -0.10            |
| Aib(3)NH | 5.49          | 0.33             | -0.17            |
| Aca(4)NH | 9.78          | -0.39            | -0.11            |

<sup>a</sup> Chemical shift values of NH proton resonances for peptide **1** in CDCl<sub>3</sub>.

<sup>b</sup>  $\Delta\delta$  is the chemical shift difference for NH protons in CDCl<sub>3</sub> and 6% (CD<sub>3</sub>)<sub>2</sub>SO/CDCl<sub>3</sub> for peptide **1**.

<sup>c</sup>  $\Delta\delta$  is the chemical shift difference for NH protons in CDCl<sub>3</sub> on heating from 298 K to 333 K for peptide **1**.

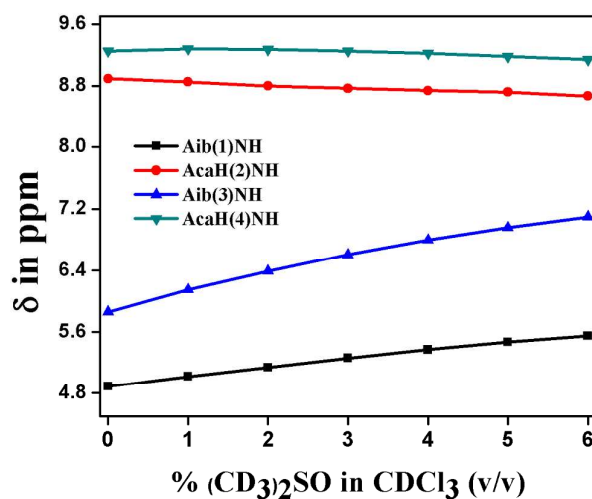

**Figure S4:** Plot of solvent dependence of NHs chemical shifts of peptide **2** at varying concentrations of (CD<sub>3</sub>)<sub>2</sub>SO in CDCl<sub>3</sub> solution.

**Table S2:** Characteristic  $^1\text{H}$  NMR parameters for peptide **2** (chemical shifts  $\delta$ )<sup>a</sup>

| Residue   | $\delta$ (NH) | $\Delta\delta^b$ | $\Delta\delta^c$ |
|-----------|---------------|------------------|------------------|
| Aib(1)NH  | 4.89          | 0.66             | -0.05            |
| AcaH(2)NH | 8.89          | -0.22            | -0.18            |
| Aib(3)NH  | 5.88          | 1.24             | -0.15            |
| AcaH(4)NH | 9.25          | -0.11            | -0.12            |

<sup>a</sup> Chemical shift values of NH proton resonances for peptide **2** in  $\text{CDCl}_3$ .

<sup>b</sup>  $\Delta\delta$  is the chemical shift difference for NH protons in  $\text{CDCl}_3$  and 6%  $(\text{CD}_3)_2\text{SO}/\text{CDCl}_3$  for peptide **2**.

<sup>c</sup>  $\Delta\delta$  is the chemical shift difference for NH protons in  $\text{CDCl}_3$  on heating from 298 K to 333 K for peptide **2**.

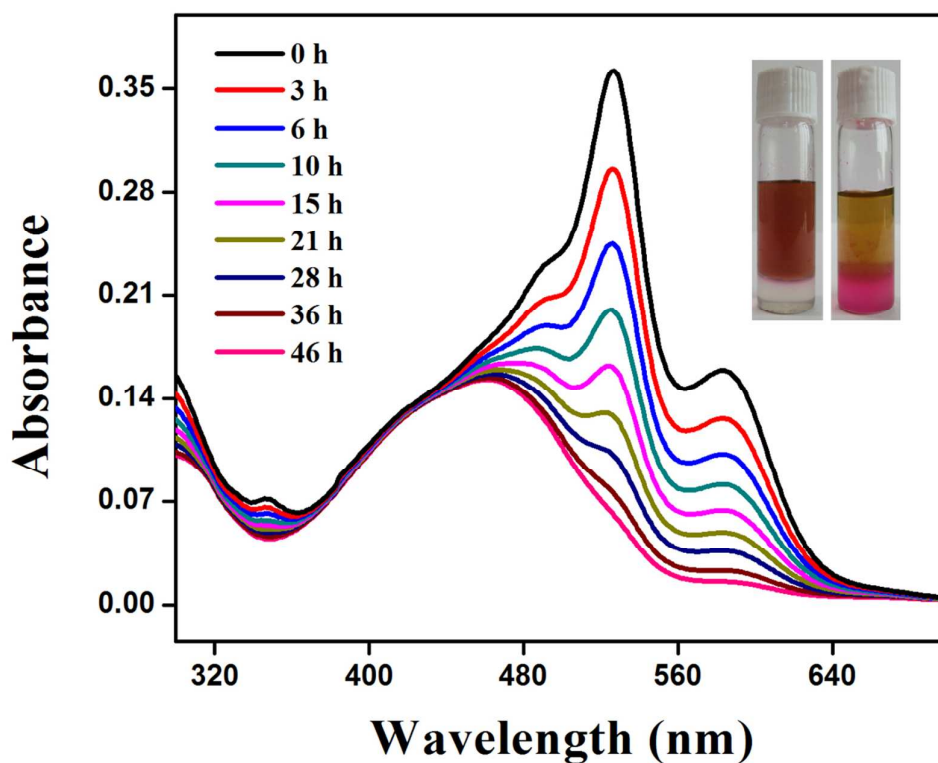

**Figure S5:** Removal of cationic dyes (rhodamine 6G and methyl violet) selectively from waste water (a mixture of rhodamine 6G, methyl violet, methyl orange and pyrocatechol violet) using peptide **2** gel from xylene.

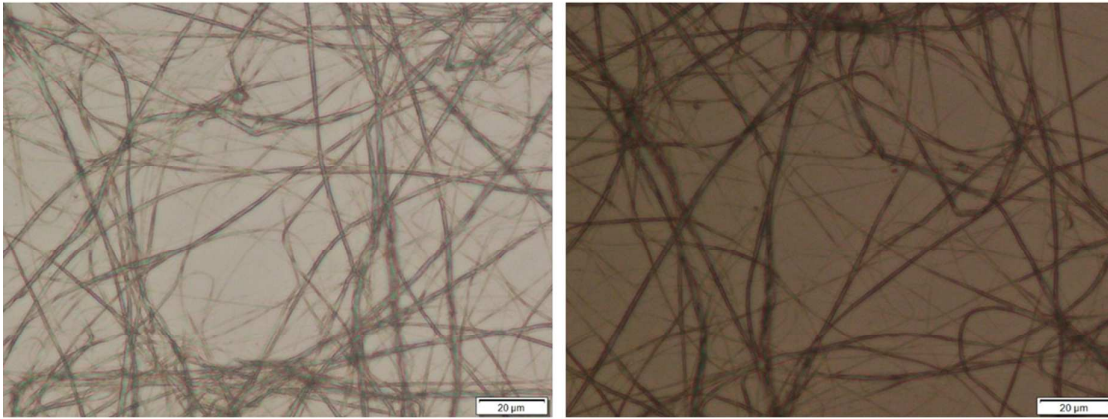

**Figure S6:** The POM images of peptide **2** xerogel showing fibrous network.

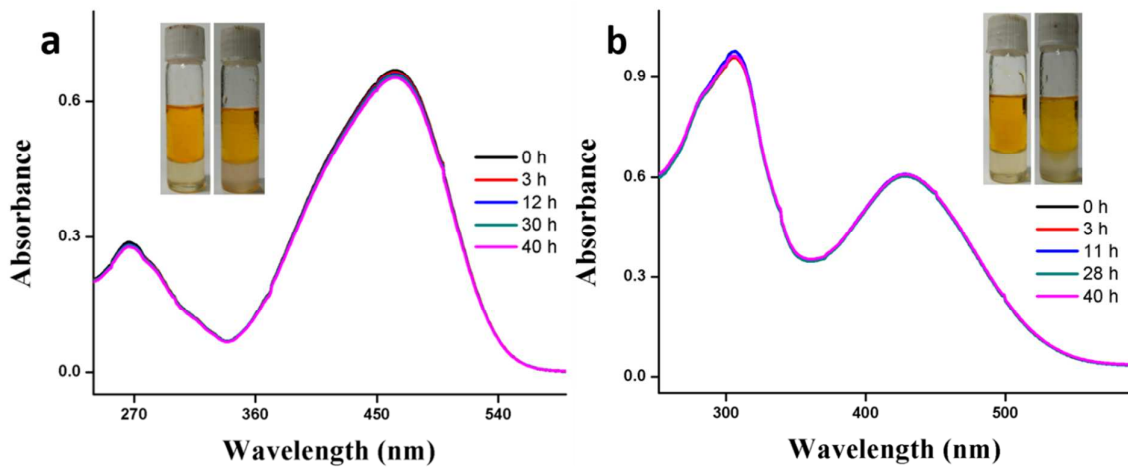

**Figure S7:** Dye removal studies using peptide **2** gel from xylene showing no absorption; (a) Methyl orange (anionic) and (b) pyrocatechol violet (neutral).

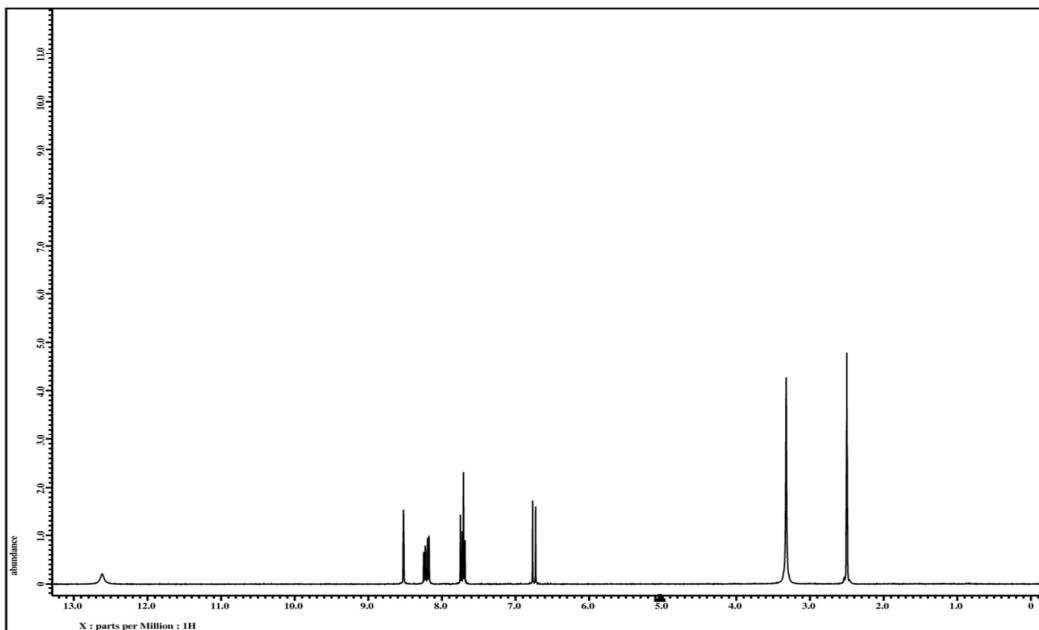

**Figure S8:** <sup>1</sup>H NMR (400 MHz, DMSO-*d*<sub>6</sub>, δppm) spectrum of *trans*-3-Nitrocinnamic acid 4.

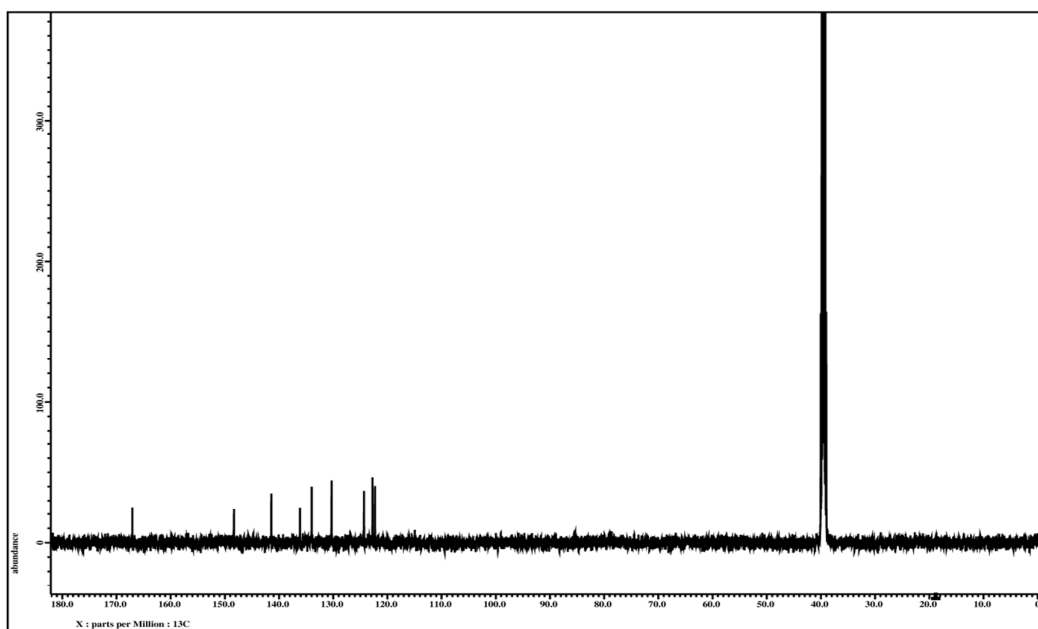

**Figure S9:** <sup>13</sup>C NMR (125 MHz, DMSO-*d*<sub>6</sub>, δppm) spectrum of *trans*-3-Nitrocinnamic acid 4.

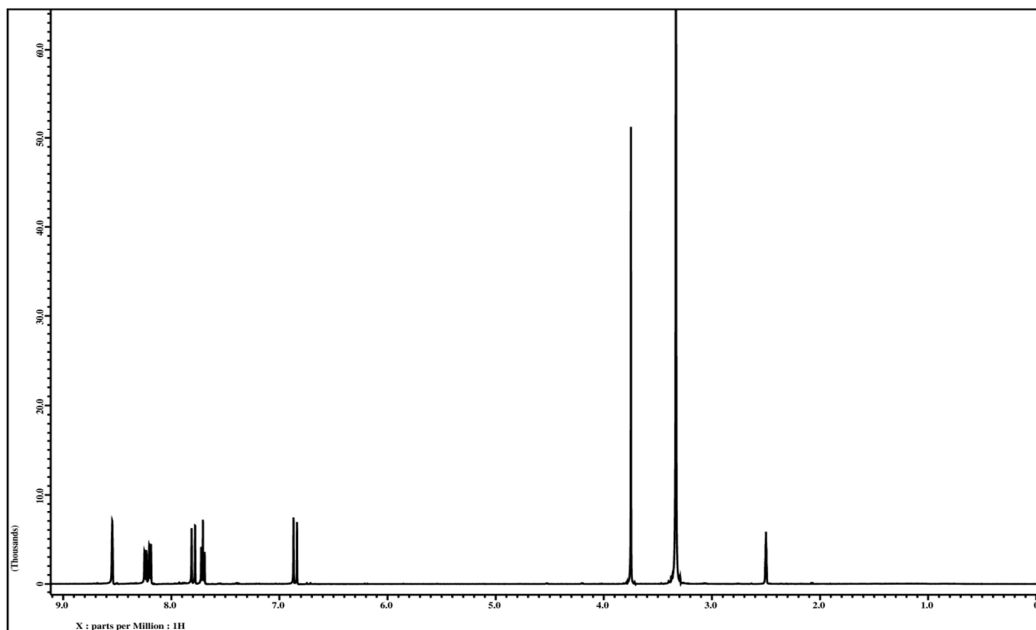

**Figure S10:** <sup>1</sup>H NMR (500 MHz, DMSO-*d*<sub>6</sub>, δppm) spectrum of **Methyl (E)-3-nitrocinnamate 5**.

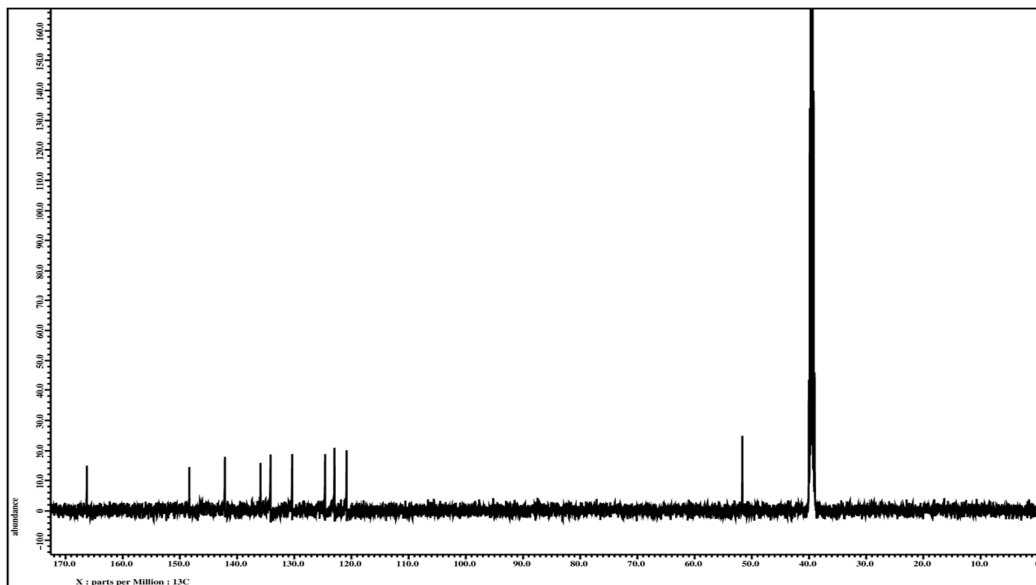

**Figure S11:** <sup>13</sup>C NMR (125 MHz, DMSO-*d*<sub>6</sub>, δppm) spectrum of **Methyl (E)-3-nitrocinnamate 5**.

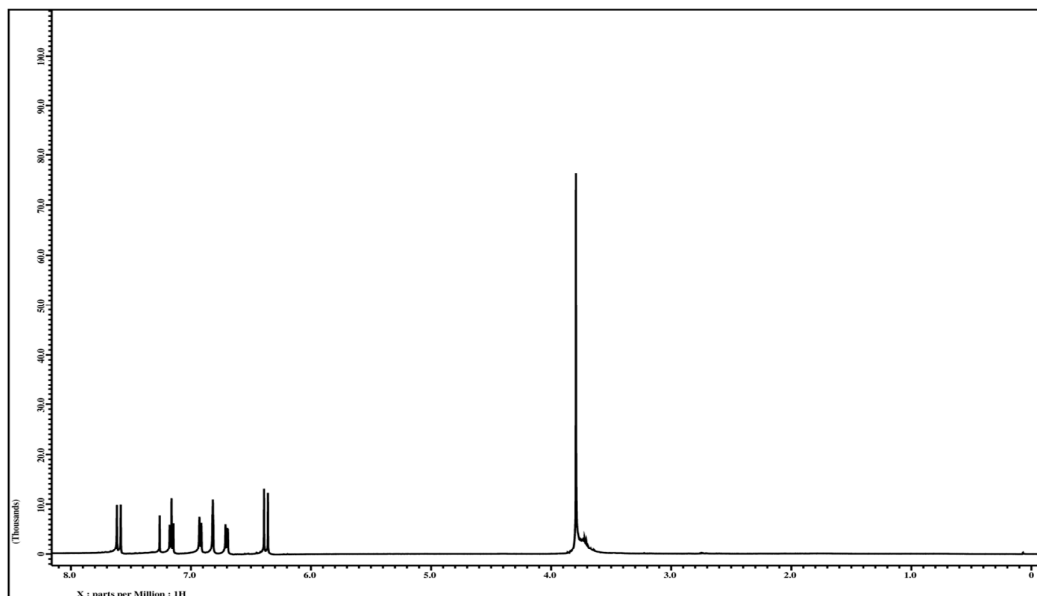

**Figure S12:** <sup>1</sup>H NMR (500 MHz, CDCl<sub>3</sub>, δppm) spectrum of **Methyl (E)-3-aminocinnamate 6**.

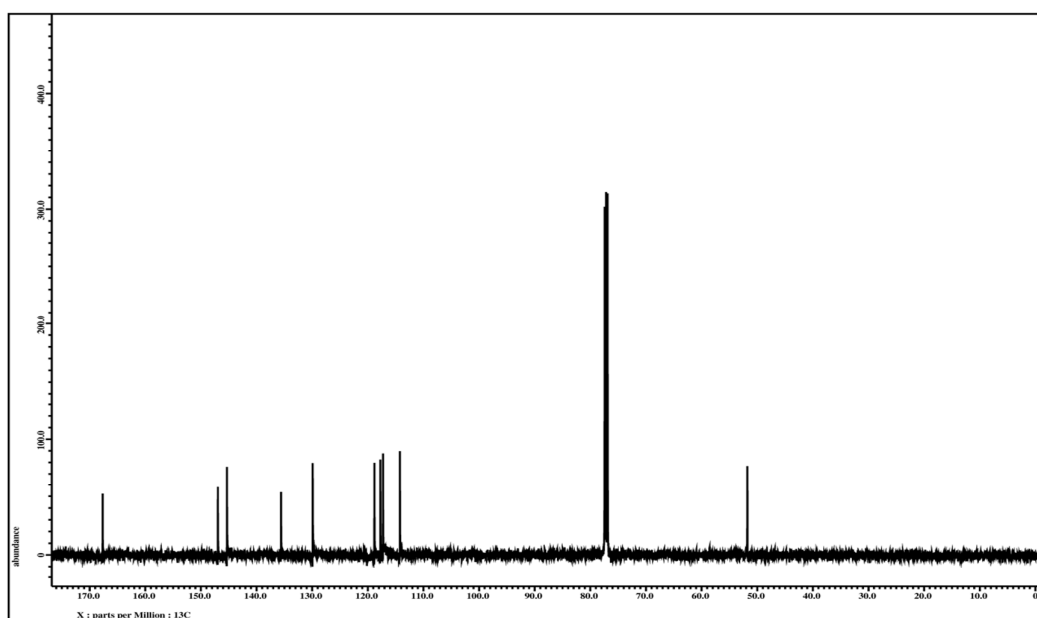

**Figure S13:** <sup>13</sup>C NMR (125 MHz, CDCl<sub>3</sub>, δppm) spectrum of **Methyl (E)-3-aminocinnamate 6**.



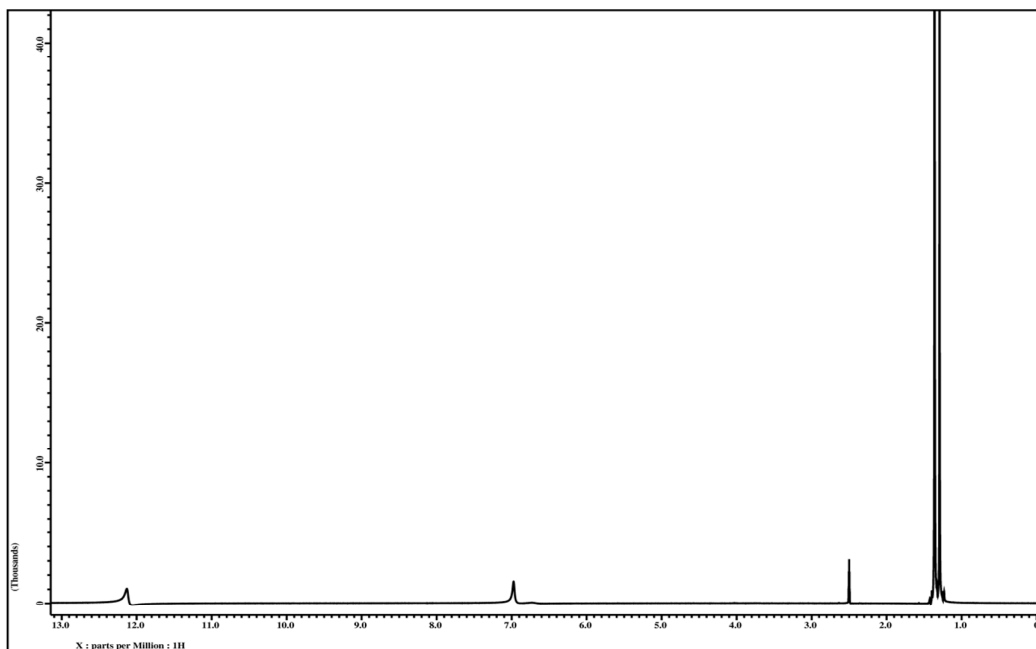

**Figure S14:**  $^1\text{H}$  NMR (500 MHz,  $\text{DMSO-}d_6$ ,  $\delta\text{ppm}$ ) spectrum of **Boc-Aib-OH 7**.

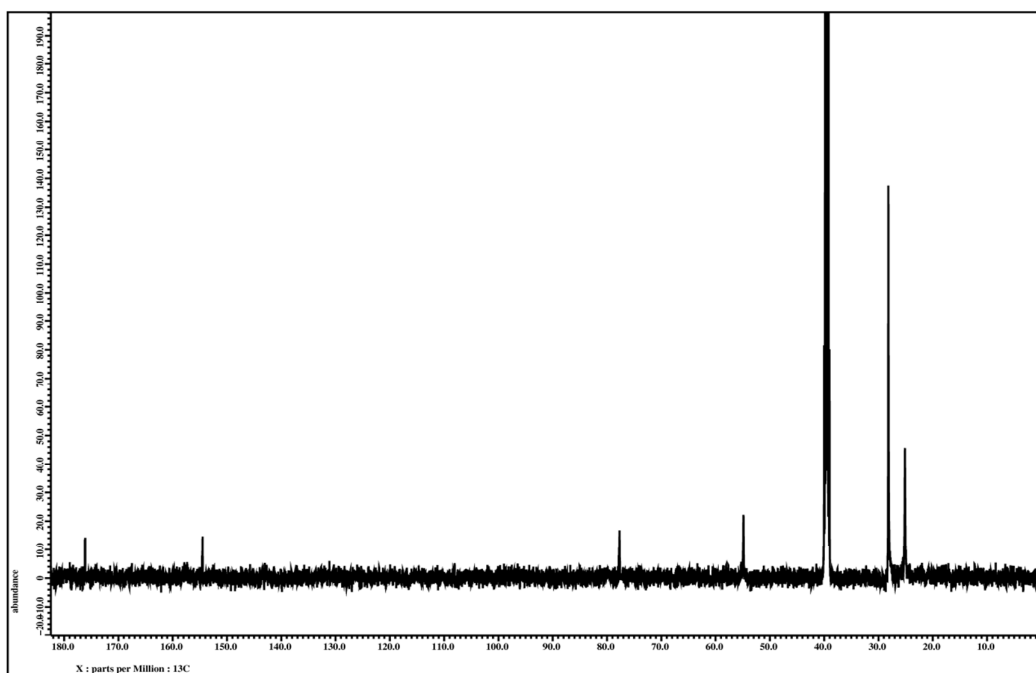

**Figure S15:**  $^{13}\text{C}$  NMR (125 MHz,  $\text{DMSO-}d_6$ ,  $\delta\text{ppm}$ ) spectrum of **Boc-Aib-OH 7**.

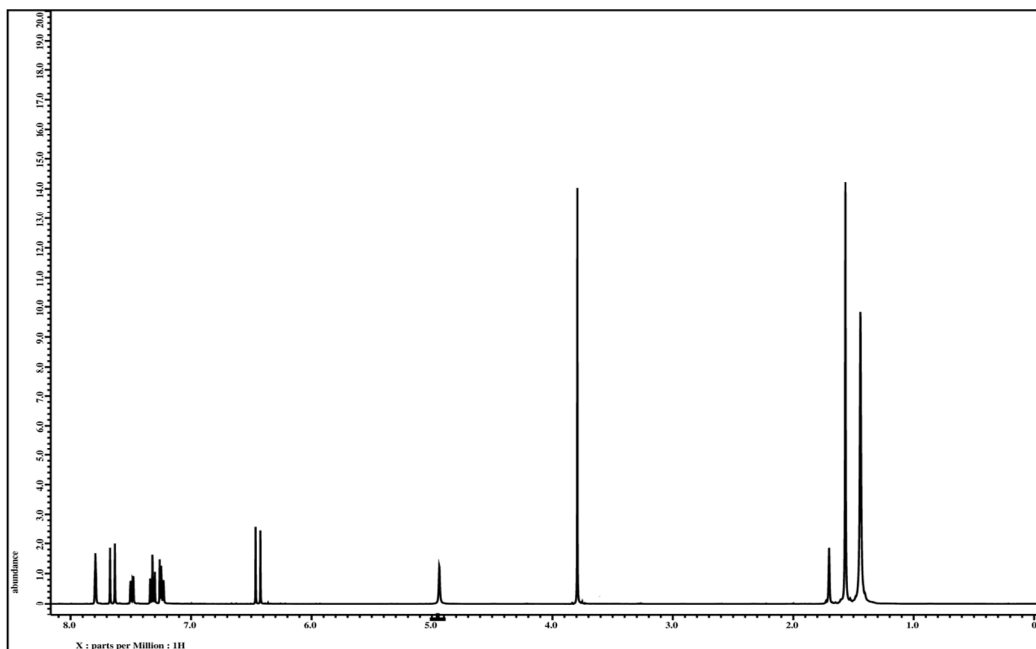

**Figure S16:** <sup>1</sup>H NMR (400 MHz, CDCl<sub>3</sub>, δppm) spectrum of **8**.

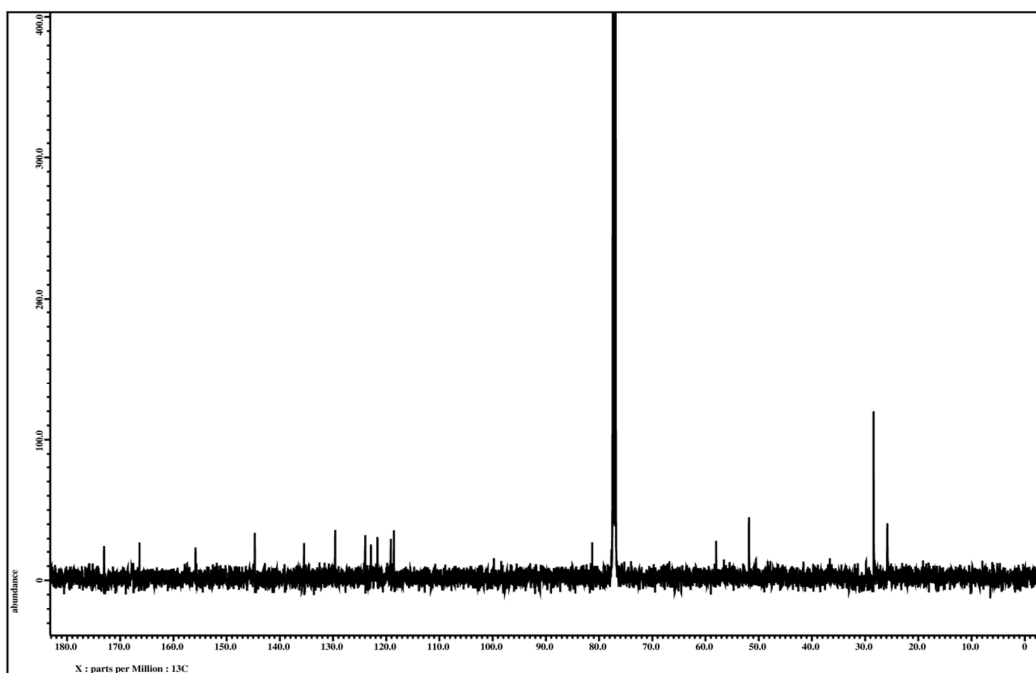

**Figure S17:** <sup>13</sup>C NMR (125 MHz, CDCl<sub>3</sub>, δppm) spectrum of **8**.

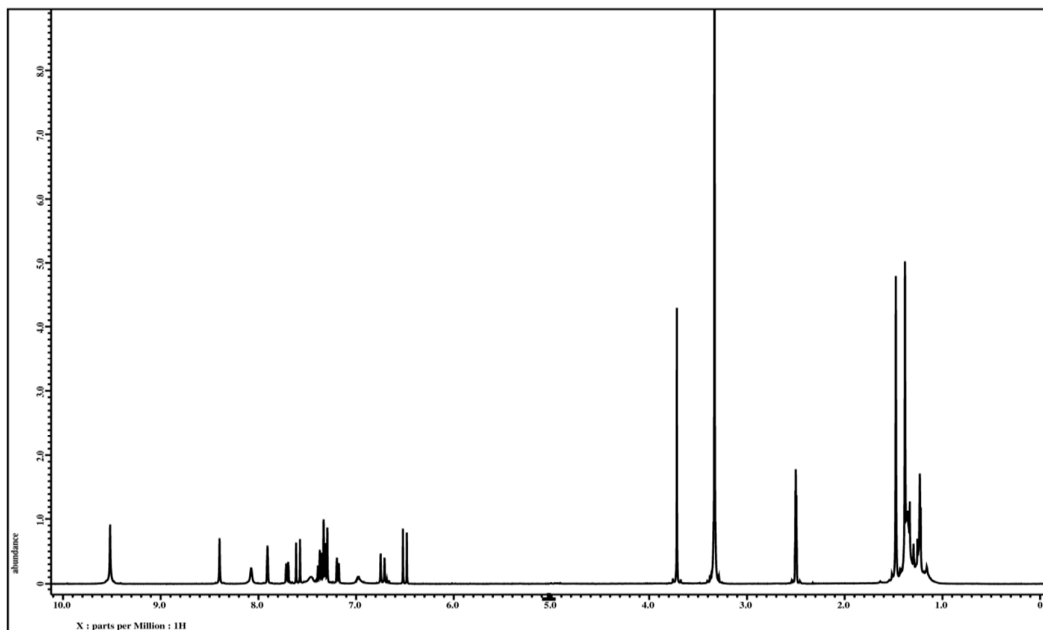

**Figure S18:**  $^1\text{H}$  NMR (400 MHz,  $\text{DMSO-}d_6$ ,  $\delta\text{ppm}$ ) spectrum of **1**.

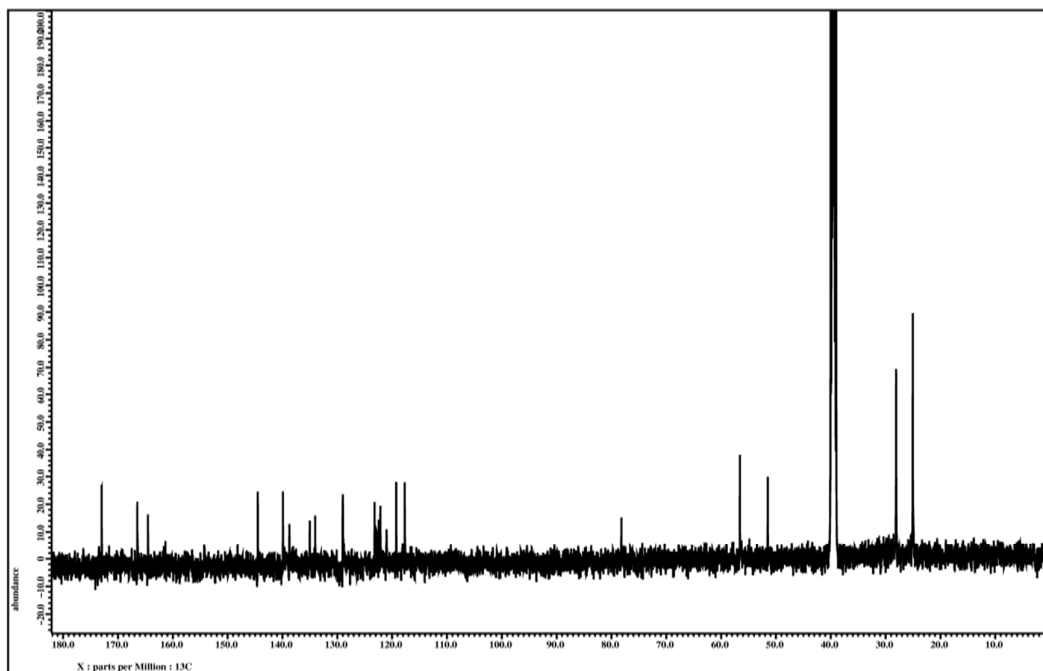

**Figure S19:**  $^{13}\text{C}$  NMR (125 MHz,  $\text{DMSO-}d_6$ ,  $\delta\text{ppm}$ ) spectrum of **1**.

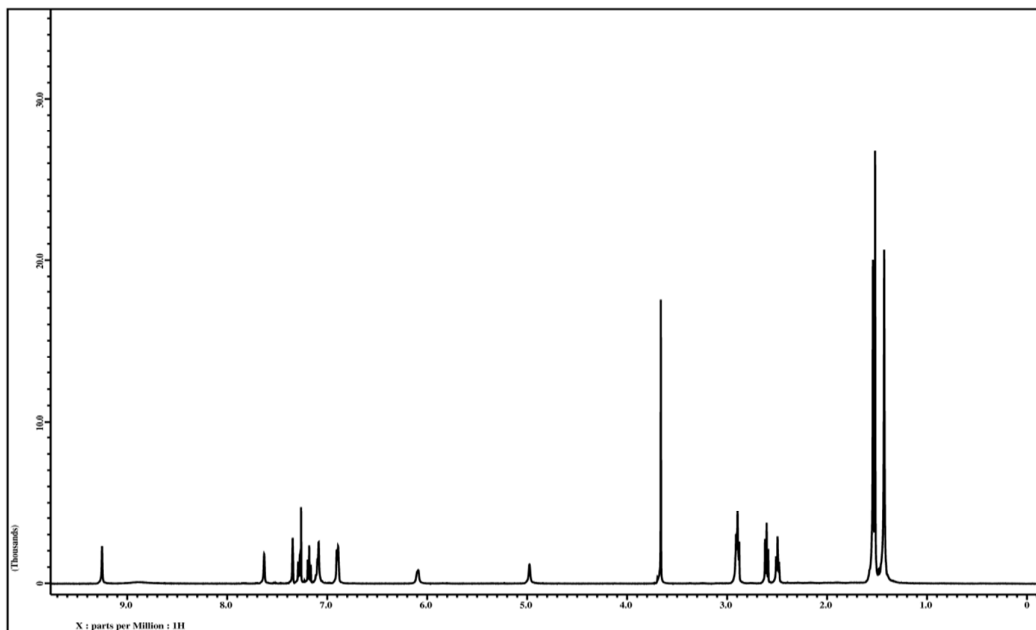

**Figure S20:**  $^1\text{H}$  NMR (500 MHz,  $\text{CDCl}_3$ ,  $\delta\text{ppm}$ ) spectrum of **2**.

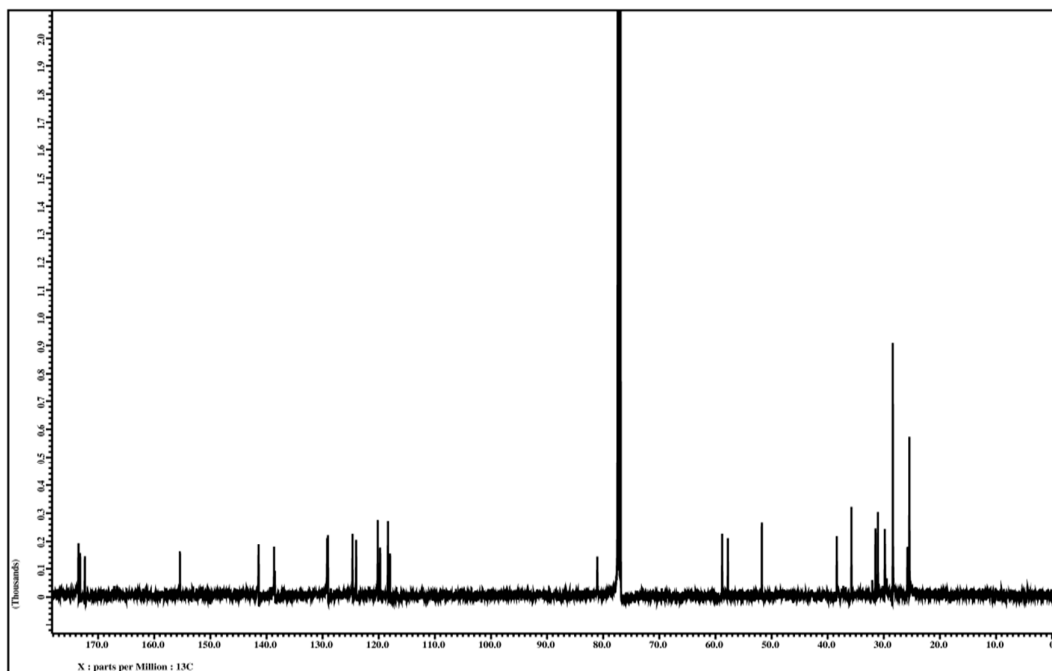

**Figure S21:**  $^{13}\text{C}$  NMR (125 MHz,  $\text{CDCl}_3$ ,  $\delta\text{ppm}$ ) spectrum of **2**.

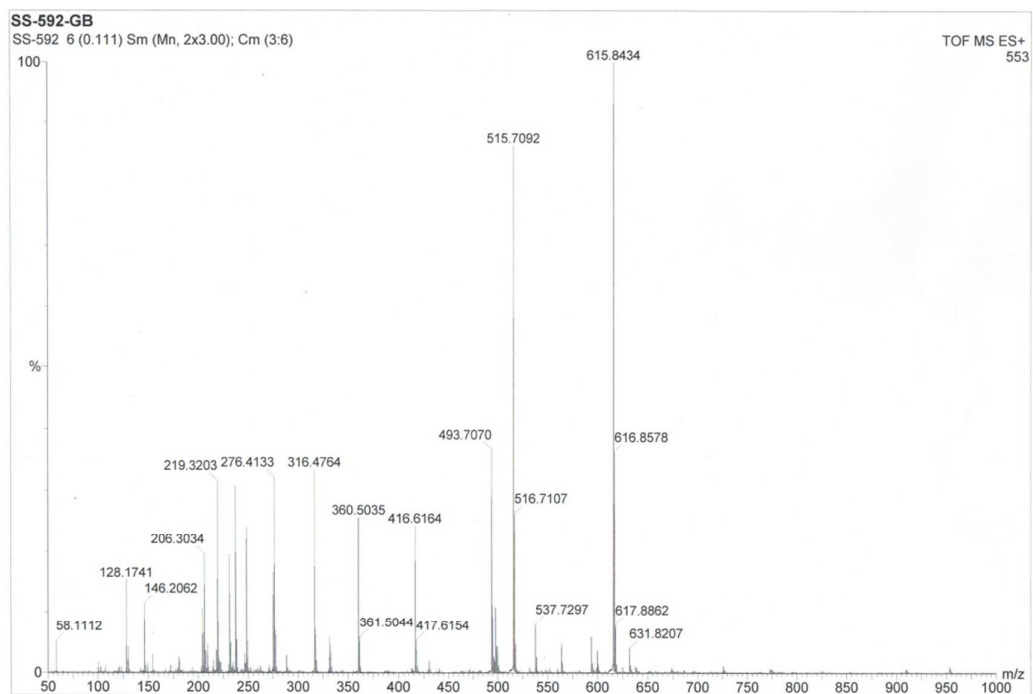

**Figure S22: Mass spectrum of peptide 1.**

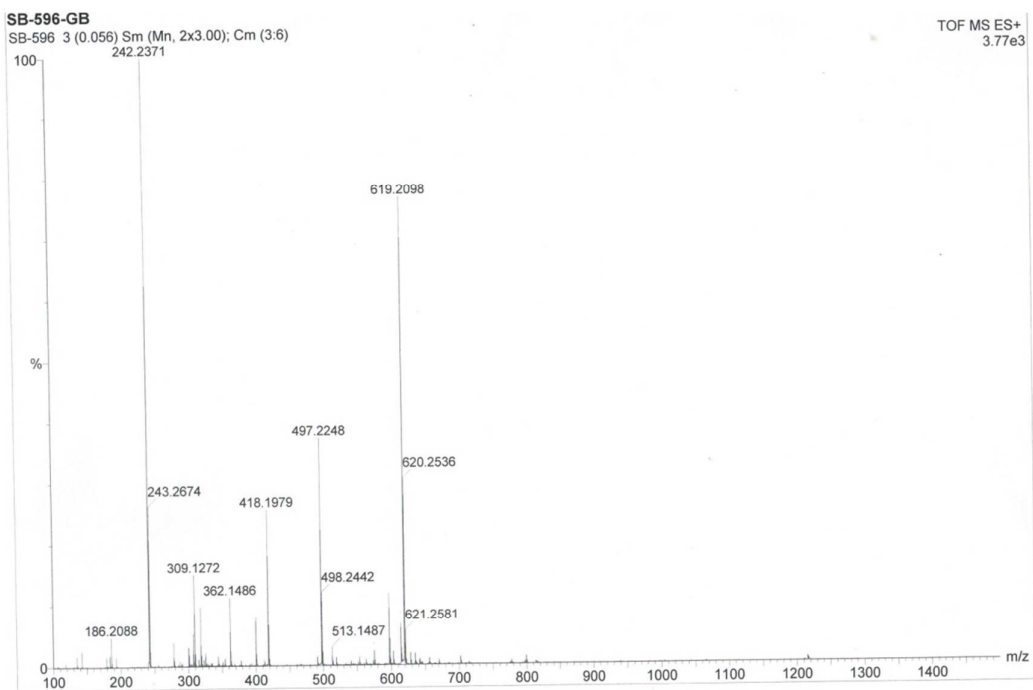

**Figure S23: Mass spectrum of peptide 2.**

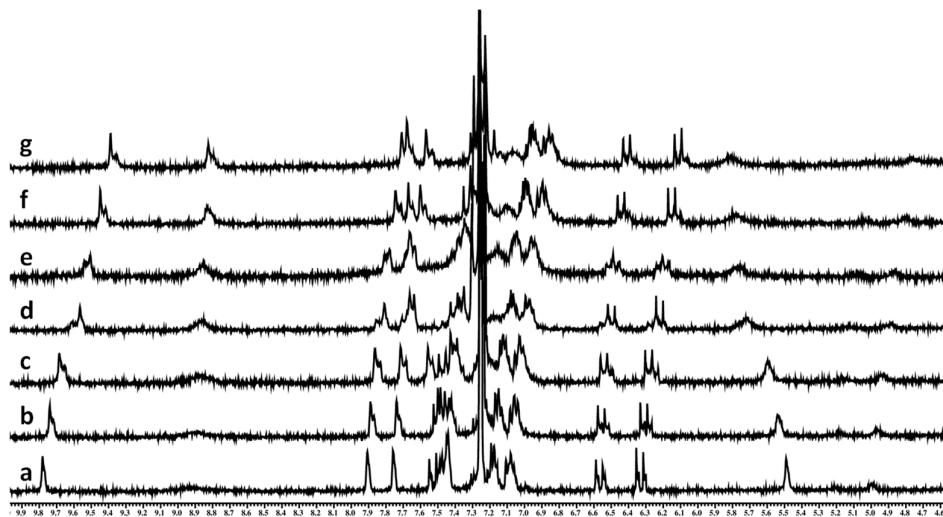

**Figure S24:** Part of <sup>1</sup>H NMR (400 MHz) solvent titration spectra of peptide **1** in CDCl<sub>3</sub> solution. % of DMSO-d<sub>6</sub> a) 0, b) 1, c) 2, d) 3, e) 4, f) 5 and g) 6.

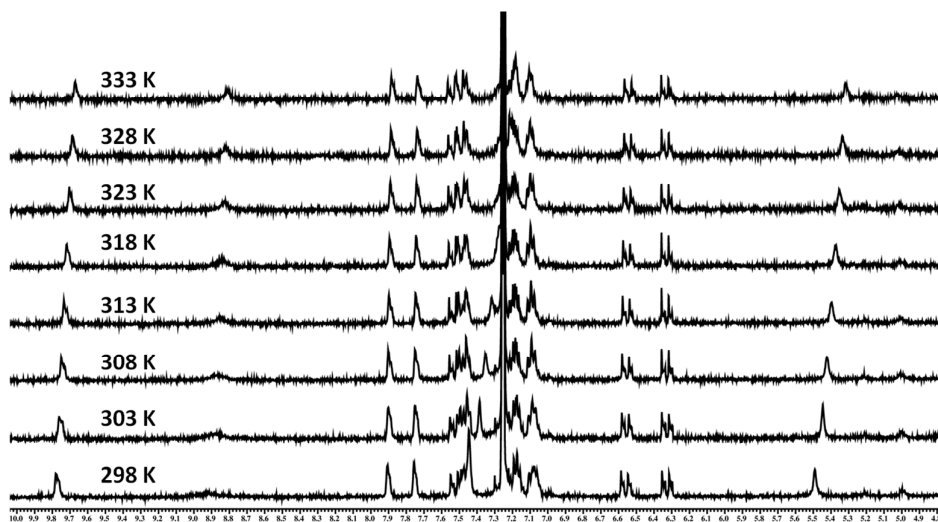

**Figure S25:** Part of <sup>1</sup>H NMR (400 MHz) spectra of peptide **1** at variable temperature in CDCl<sub>3</sub>.

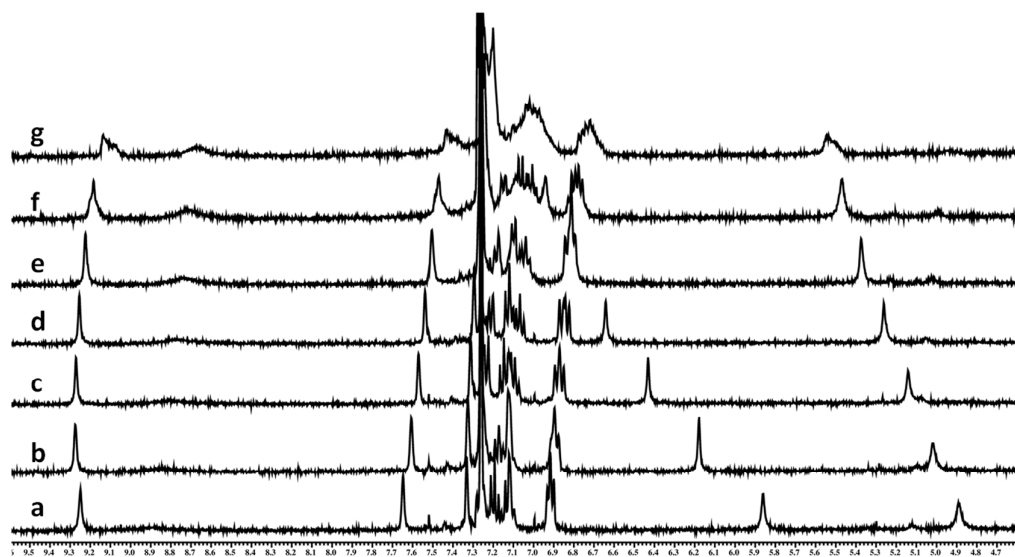

**Figure S26:** Part of <sup>1</sup>H NMR (400 MHz) solvent titration spectra of peptide **2** in CDCl<sub>3</sub> solution. % of DMSO-d<sub>6</sub> a) 0, b) 1, c) 2, d) 3, e) 4, f) 5 and g) 6.

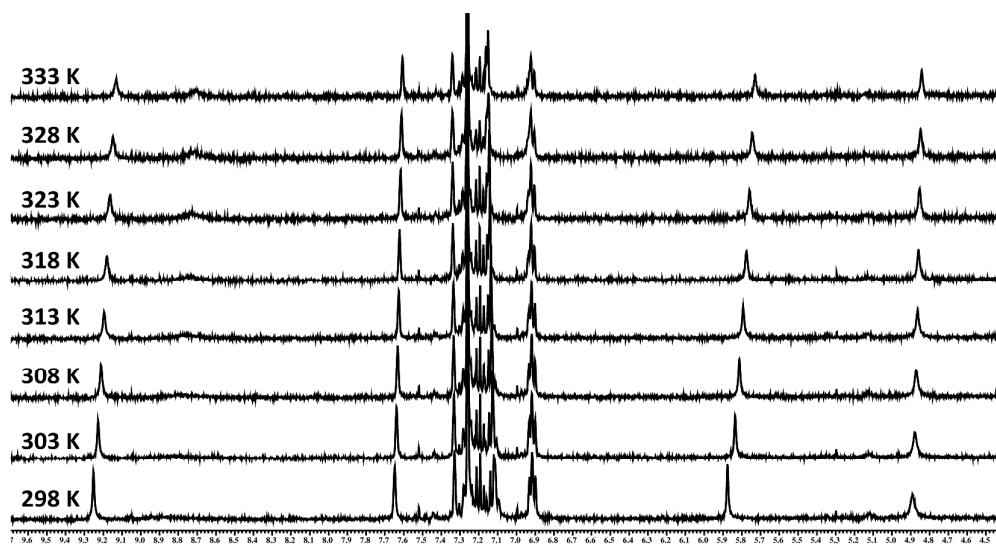

**Figure S27:** Part of <sup>1</sup>H NMR (400 MHz) spectra of peptide **2** at variable temperature in CDCl<sub>3</sub>.
